# Supplementary material for: The use of a germene for the synthesis of esters of α-germyl-substituted α-amino acid and α-aminophosphonic acid
Source: Royal Society of Chemistry journal article supplement (doi:10.1039/b303661h), 2003-01-01
Supplement: b303661h.pdf [file b303661h.pdf]

## Supplementary Information

### **The use of a germene for the synthesis of esters of $\alpha$ -germyl-substituted $\alpha$ -amino acid and $\alpha$ -aminophosphonic acid**

**S. Ech-Cherif El Kettani, J. Escudié, C. Couret, H. Ranaivonjatovo, M. Lazraq,  
M. Soufiaoui, H. Gornitzka, G. Cretiu Nemes**

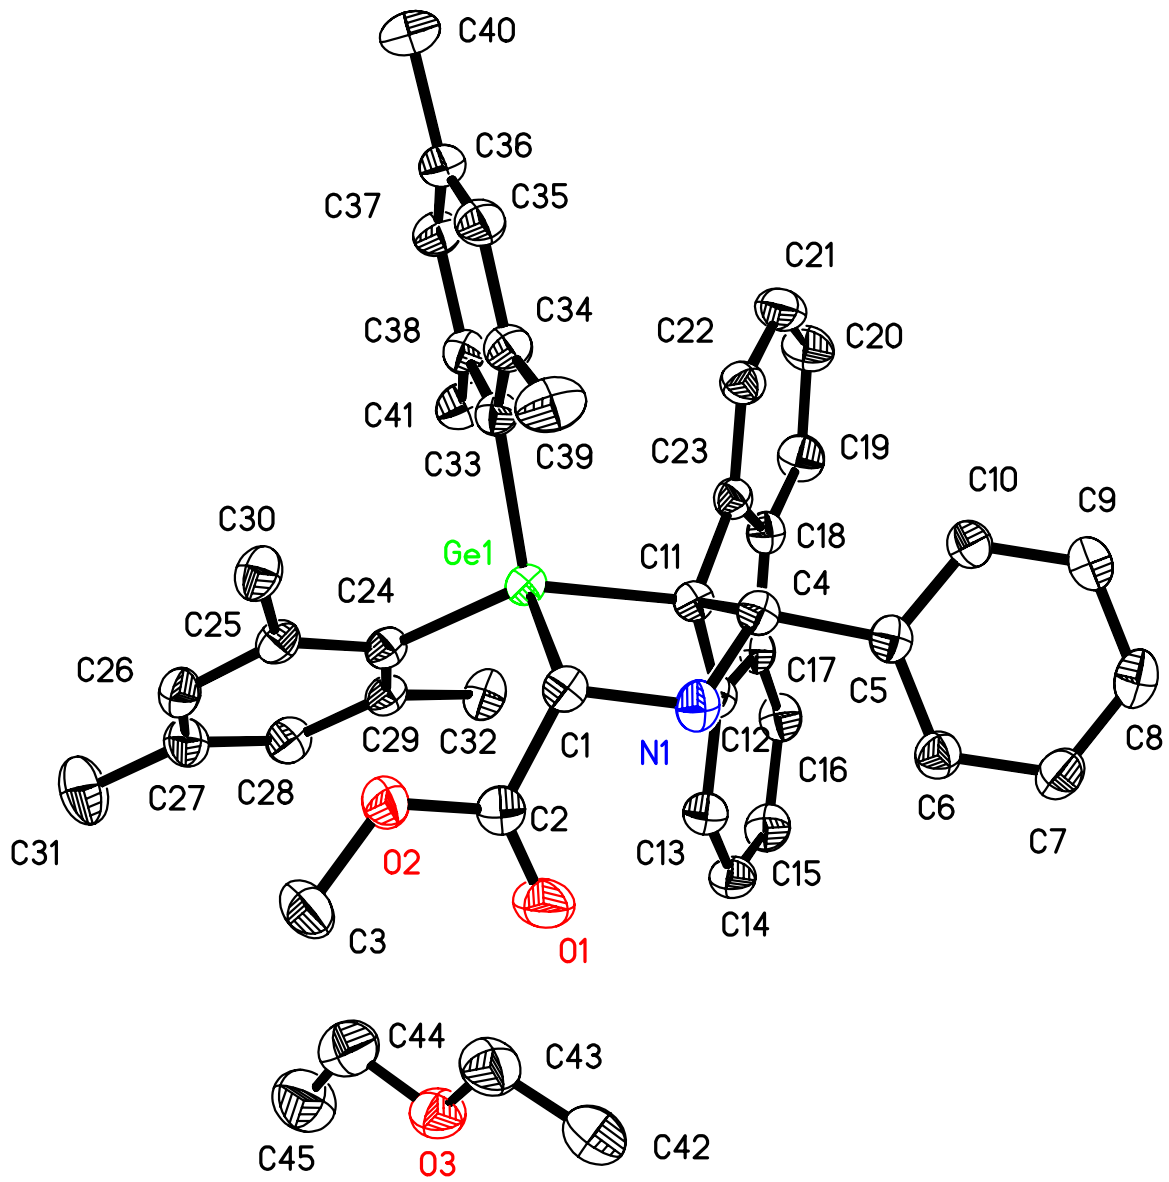

Table 1. Crystal data and structure refinement for **4**.

|                                   |                                                          |                                                               |
|-----------------------------------|----------------------------------------------------------|---------------------------------------------------------------|
| Identification code               | <b>4</b>                                                 |                                                               |
| Empirical formula                 | C <sub>45</sub> H <sub>51</sub> Ge N O <sub>3</sub>      |                                                               |
| Formula weight                    | 726.46                                                   |                                                               |
| Temperature                       | 193(2) K                                                 |                                                               |
| Wavelength                        | 0.71073 Å                                                |                                                               |
| Crystal system                    | Triclinic                                                |                                                               |
| Space group                       | P-1                                                      |                                                               |
| Unit cell dimensions              | a = 11.9777(7) Å<br>b = 12.1155(7) Å<br>c = 14.5540(8) Å | α = 101.8250(10)°.<br>β = 95.7740(10)°.<br>γ = 108.6110(10)°. |
| Volume                            | 1927.47(19) Å <sup>3</sup>                               |                                                               |
| Z                                 | 2                                                        |                                                               |
| Density (calculated)              | 1.252 Mg/m <sup>3</sup>                                  |                                                               |
| Absorption coefficient            | 0.835 mm <sup>-1</sup>                                   |                                                               |
| F(000)                            | 768                                                      |                                                               |
| Crystal size                      | 0.5 x 0.7 x 0.7 mm <sup>3</sup>                          |                                                               |
| Theta range for data collection   | 1.45 to 29.43°.                                          |                                                               |
| Index ranges                      | -15 ≤ h ≤ 11, -15 ≤ k ≤ 16, -18 ≤ l ≤ 19                 |                                                               |
| Reflections collected             | 12972                                                    |                                                               |
| Independent reflections           | 9290 [R(int) = 0.0247]                                   |                                                               |
| Completeness to theta = 29.43°    | 87.1 %                                                   |                                                               |
| Absorption correction             | SEMI-EMPIRICAL                                           |                                                               |
| Max. and min. transmission        | 1.000000 and 0.760492                                    |                                                               |
| Refinement method                 | Full-matrix least-squares on F <sup>2</sup>              |                                                               |
| Data / restraints / parameters    | 9290 / 0 / 463                                           |                                                               |
| Goodness-of-fit on F <sup>2</sup> | 1.028                                                    |                                                               |
| Final R indices [I > 2σ(I)]       | R1 = 0.0316, wR2 = 0.0830                                |                                                               |
| R indices (all data)              | R1 = 0.0380, wR2 = 0.0864                                |                                                               |
| Largest diff. peak and hole       | 0.493 and -0.326 e.Å <sup>-3</sup>                       |                                                               |

Table 2. Atomic coordinates ( $\times 10^4$ ) and equivalent isotropic displacement parameters ( $\text{\AA}^2 \times 10^3$ ) for 4.  $U(\text{eq})$  is defined as one third of the trace of the orthogonalized  $U^{\text{ij}}$  tensor.

|       | x       | y        | z       | $U(\text{eq})$ |
|-------|---------|----------|---------|----------------|
| Ge(1) | 8325(1) | 7372(1)  | 2557(1) | 20(1)          |
| C(1)  | 9015(1) | 9083(1)  | 3382(1) | 23(1)          |
| C(2)  | 8408(1) | 9891(1)  | 3075(1) | 27(1)          |
| O(1)  | 7616(1) | 10148(1) | 3412(1) | 44(1)          |
| O(2)  | 8877(1) | 10318(1) | 2369(1) | 34(1)          |
| C(3)  | 8302(2) | 11000(2) | 1928(2) | 47(1)          |
| N(1)  | 8857(1) | 8991(1)  | 4347(1) | 26(1)          |
| C(4)  | 8708(1) | 7799(1)  | 4501(1) | 23(1)          |
| C(5)  | 8479(1) | 7739(1)  | 5498(1) | 24(1)          |
| C(6)  | 7905(1) | 8435(1)  | 6007(1) | 29(1)          |
| C(7)  | 7719(2) | 8349(2)  | 6922(1) | 34(1)          |
| C(8)  | 8085(2) | 7566(2)  | 7337(1) | 36(1)          |
| C(9)  | 8647(2) | 6861(2)  | 6836(1) | 36(1)          |
| C(10) | 8846(1) | 6955(2)  | 5929(1) | 31(1)          |
| C(11) | 7707(1) | 6813(1)  | 3701(1) | 21(1)          |
| C(12) | 6446(1) | 6741(1)  | 3818(1) | 22(1)          |
| C(13) | 5926(1) | 7621(1)  | 3914(1) | 26(1)          |
| C(14) | 4718(1) | 7298(2)  | 3999(1) | 31(1)          |
| C(15) | 4036(1) | 6122(2)  | 3972(1) | 33(1)          |
| C(16) | 4549(1) | 5238(2)  | 3884(1) | 30(1)          |
| C(17) | 5755(1) | 5554(1)  | 3814(1) | 23(1)          |
| C(18) | 6514(1) | 4821(1)  | 3732(1) | 24(1)          |
| C(19) | 6253(2) | 3615(2)  | 3722(1) | 32(1)          |
| C(20) | 7172(2) | 3147(2)  | 3698(1) | 37(1)          |
| C(21) | 8330(2) | 3880(2)  | 3692(1) | 35(1)          |
| C(22) | 8596(1) | 5082(2)  | 3693(1) | 28(1)          |
| C(23) | 7677(1) | 5558(1)  | 3696(1) | 23(1)          |
| C(24) | 7375(1) | 7366(1)  | 1360(1) | 23(1)          |
| C(25) | 8029(1) | 7993(1)  | 752(1)  | 25(1)          |
| C(26) | 7415(2) | 8116(2)  | -67(1)  | 29(1)          |
| C(27) | 6179(2) | 7603(2)  | -332(1) | 32(1)          |

|       |          |          |          |       |
|-------|----------|----------|----------|-------|
| C(28) | 5558(1)  | 6934(2)  | 240(1)   | 30(1) |
| C(29) | 6126(1)  | 6799(1)  | 1076(1)  | 24(1) |
| C(30) | 9381(1)  | 8489(2)  | 907(1)   | 32(1) |
| C(31) | 5535(2)  | 7717(2)  | -1239(2) | 50(1) |
| C(32) | 5348(1)  | 6001(2)  | 1604(1)  | 30(1) |
| C(33) | 9492(1)  | 6583(1)  | 2199(1)  | 24(1) |
| C(34) | 10745(1) | 7082(2)  | 2522(1)  | 28(1) |
| C(35) | 11472(1) | 6444(2)  | 2189(1)  | 31(1) |
| C(36) | 11018(2) | 5332(2)  | 1545(1)  | 32(1) |
| C(37) | 9783(2)  | 4828(2)  | 1249(1)  | 31(1) |
| C(38) | 9017(1)  | 5424(1)  | 1574(1)  | 26(1) |
| C(39) | 11380(1) | 8291(2)  | 3221(1)  | 39(1) |
| C(40) | 11833(2) | 4684(2)  | 1178(2)  | 47(1) |
| C(41) | 7689(1)  | 4748(2)  | 1249(1)  | 32(1) |
| C(42) | 4805(2)  | 10315(2) | 3662(2)  | 47(1) |
| C(43) | 4862(2)  | 9757(2)  | 2671(2)  | 51(1) |
| O(3)  | 3743(1)  | 9476(1)  | 2067(1)  | 43(1) |
| C(44) | 3709(2)  | 8847(2)  | 1133(2)  | 58(1) |
| C(45) | 2509(2)  | 8582(2)  | 546(2)   | 65(1) |

---

Table 3. Bond lengths [Å] and angles [°] for **4**.

---

|             |            |
|-------------|------------|
| Ge(1)-C(24) | 1.9800(14) |
| Ge(1)-C(33) | 1.9841(15) |
| Ge(1)-C(1)  | 2.0274(14) |
| Ge(1)-C(11) | 2.0410(14) |
| C(1)-N(1)   | 1.4581(19) |
| C(1)-C(2)   | 1.501(2)   |
| C(2)-O(1)   | 1.207(2)   |
| C(2)-O(2)   | 1.3361(19) |
| O(2)-C(3)   | 1.435(2)   |
| N(1)-C(4)   | 1.464(2)   |
| C(4)-C(5)   | 1.515(2)   |
| C(4)-C(11)  | 1.5670(19) |
| C(5)-C(10)  | 1.396(2)   |
| C(5)-C(6)   | 1.396(2)   |
| C(6)-C(7)   | 1.391(2)   |
| C(7)-C(8)   | 1.382(3)   |
| C(8)-C(9)   | 1.387(3)   |
| C(9)-C(10)  | 1.385(2)   |
| C(11)-C(23) | 1.509(2)   |
| C(11)-C(12) | 1.5130(19) |
| C(12)-C(13) | 1.387(2)   |
| C(12)-C(17) | 1.410(2)   |
| C(13)-C(14) | 1.399(2)   |
| C(14)-C(15) | 1.388(2)   |
| C(15)-C(16) | 1.385(2)   |
| C(16)-C(17) | 1.392(2)   |
| C(17)-C(18) | 1.457(2)   |
| C(18)-C(19) | 1.390(2)   |
| C(18)-C(23) | 1.408(2)   |
| C(19)-C(20) | 1.390(2)   |
| C(20)-C(21) | 1.389(3)   |
| C(21)-C(22) | 1.387(2)   |
| C(22)-C(23) | 1.396(2)   |
| C(24)-C(29) | 1.4093(19) |

|             |          |
|-------------|----------|
| C(24)-C(25) | 1.417(2) |
| C(25)-C(26) | 1.396(2) |
| C(25)-C(30) | 1.511(2) |
| C(26)-C(27) | 1.388(2) |
| C(27)-C(28) | 1.386(2) |
| C(27)-C(31) | 1.515(2) |
| C(28)-C(29) | 1.398(2) |
| C(29)-C(32) | 1.506(2) |
| C(33)-C(38) | 1.409(2) |
| C(33)-C(34) | 1.415(2) |
| C(34)-C(35) | 1.397(2) |
| C(34)-C(39) | 1.510(2) |
| C(35)-C(36) | 1.379(3) |
| C(36)-C(37) | 1.391(2) |
| C(36)-C(40) | 1.509(2) |
| C(37)-C(38) | 1.399(2) |
| C(38)-C(41) | 1.511(2) |
| C(42)-C(43) | 1.479(3) |
| C(43)-O(3)  | 1.426(2) |
| O(3)-C(44)  | 1.405(3) |
| C(44)-C(45) | 1.498(3) |

|                   |            |
|-------------------|------------|
| C(24)-Ge(1)-C(33) | 107.39(6)  |
| C(24)-Ge(1)-C(1)  | 108.42(6)  |
| C(33)-Ge(1)-C(1)  | 116.49(6)  |
| C(24)-Ge(1)-C(11) | 127.84(6)  |
| C(33)-Ge(1)-C(11) | 107.23(6)  |
| C(1)-Ge(1)-C(11)  | 89.16(6)   |
| N(1)-C(1)-C(2)    | 110.46(12) |
| N(1)-C(1)-Ge(1)   | 105.46(9)  |
| C(2)-C(1)-Ge(1)   | 112.95(10) |
| O(1)-C(2)-O(2)    | 123.36(15) |
| O(1)-C(2)-C(1)    | 126.03(15) |
| O(2)-C(2)-C(1)    | 110.61(13) |
| C(2)-O(2)-C(3)    | 117.07(14) |
| C(1)-N(1)-C(4)    | 113.97(12) |

|                   |            |
|-------------------|------------|
| N(1)-C(4)-C(5)    | 111.46(12) |
| N(1)-C(4)-C(11)   | 109.66(12) |
| C(5)-C(4)-C(11)   | 112.97(11) |
| C(10)-C(5)-C(6)   | 118.13(14) |
| C(10)-C(5)-C(4)   | 119.16(14) |
| C(6)-C(5)-C(4)    | 122.71(13) |
| C(7)-C(6)-C(5)    | 120.45(15) |
| C(8)-C(7)-C(6)    | 120.65(16) |
| C(7)-C(8)-C(9)    | 119.51(16) |
| C(10)-C(9)-C(8)   | 119.93(16) |
| C(9)-C(10)-C(5)   | 121.32(16) |
| C(23)-C(11)-C(12) | 102.54(11) |
| C(23)-C(11)-C(4)  | 112.41(12) |
| C(12)-C(11)-C(4)  | 114.21(11) |
| C(23)-C(11)-Ge(1) | 112.95(9)  |
| C(12)-C(11)-Ge(1) | 117.63(9)  |
| C(4)-C(11)-Ge(1)  | 97.63(9)   |
| C(13)-C(12)-C(17) | 119.64(13) |
| C(13)-C(12)-C(11) | 130.55(13) |
| C(17)-C(12)-C(11) | 109.81(12) |
| C(12)-C(13)-C(14) | 118.61(14) |
| C(15)-C(14)-C(13) | 121.37(15) |
| C(16)-C(15)-C(14) | 120.48(15) |
| C(15)-C(16)-C(17) | 118.54(15) |
| C(16)-C(17)-C(12) | 121.33(14) |
| C(16)-C(17)-C(18) | 129.86(14) |
| C(12)-C(17)-C(18) | 108.81(12) |
| C(19)-C(18)-C(23) | 121.16(14) |
| C(19)-C(18)-C(17) | 130.36(14) |
| C(23)-C(18)-C(17) | 108.44(13) |
| C(18)-C(19)-C(20) | 118.77(15) |
| C(21)-C(20)-C(19) | 120.25(16) |
| C(22)-C(21)-C(20) | 121.40(16) |
| C(21)-C(22)-C(23) | 119.01(15) |
| C(22)-C(23)-C(18) | 119.35(14) |
| C(22)-C(23)-C(11) | 130.37(13) |



|                   |            |
|-------------------|------------|
| C(18)-C(23)-C(11) | 110.24(12) |
| C(29)-C(24)-C(25) | 118.52(13) |
| C(29)-C(24)-Ge(1) | 125.51(11) |
| C(25)-C(24)-Ge(1) | 115.97(10) |
| C(26)-C(25)-C(24) | 119.45(14) |
| C(26)-C(25)-C(30) | 116.94(14) |
| C(24)-C(25)-C(30) | 123.53(14) |
| C(27)-C(26)-C(25) | 122.32(15) |
| C(28)-C(27)-C(26) | 117.55(14) |
| C(28)-C(27)-C(31) | 121.00(16) |
| C(26)-C(27)-C(31) | 121.38(16) |
| C(27)-C(28)-C(29) | 122.47(14) |
| C(28)-C(29)-C(24) | 119.49(14) |
| C(28)-C(29)-C(32) | 116.79(13) |
| C(24)-C(29)-C(32) | 123.69(13) |
| C(38)-C(33)-C(34) | 118.02(14) |
| C(38)-C(33)-Ge(1) | 116.42(10) |
| C(34)-C(33)-Ge(1) | 125.55(12) |
| C(35)-C(34)-C(33) | 119.71(15) |
| C(35)-C(34)-C(39) | 116.13(14) |
| C(33)-C(34)-C(39) | 124.16(14) |
| C(36)-C(35)-C(34) | 122.53(15) |
| C(35)-C(36)-C(37) | 117.62(14) |
| C(35)-C(36)-C(40) | 121.11(16) |
| C(37)-C(36)-C(40) | 121.27(17) |
| C(36)-C(37)-C(38) | 121.93(16) |
| C(37)-C(38)-C(33) | 120.08(14) |
| C(37)-C(38)-C(41) | 116.78(14) |
| C(33)-C(38)-C(41) | 123.12(13) |
| O(3)-C(43)-C(42)  | 109.79(17) |
| C(44)-O(3)-C(43)  | 112.28(16) |
| O(3)-C(44)-C(45)  | 109.09(19) |

---

Symmetry transformations used to generate equivalent atoms:

Table 4. Anisotropic displacement parameters ( $\text{\AA}^2 \times 10^3$ ) for **4**. The anisotropic displacement factor exponent takes the form:  $-2\pi^2 [ h^2 a^{*2} U^{11} + \dots + 2 h k a^* b^* U^{12} ]$

|       | U <sup>11</sup> | U <sup>22</sup> | U <sup>33</sup> | U <sup>23</sup> | U <sup>13</sup> | U <sup>12</sup> |
|-------|-----------------|-----------------|-----------------|-----------------|-----------------|-----------------|
| Ge(1) | 16(1)           | 21(1)           | 20(1)           | 2(1)            | 2(1)            | 4(1)            |
| C(1)  | 19(1)           | 22(1)           | 23(1)           | 3(1)            | 2(1)            | 3(1)            |
| C(2)  | 26(1)           | 21(1)           | 27(1)           | 3(1)            | 2(1)            | 3(1)            |
| O(1)  | 42(1)           | 44(1)           | 60(1)           | 25(1)           | 23(1)           | 24(1)           |
| O(2)  | 45(1)           | 31(1)           | 31(1)           | 12(1)           | 10(1)           | 15(1)           |
| C(3)  | 68(1)           | 41(1)           | 41(1)           | 19(1)           | 8(1)            | 27(1)           |
| N(1)  | 27(1)           | 21(1)           | 21(1)           | 1(1)            | -1(1)           | 2(1)            |
| C(4)  | 18(1)           | 23(1)           | 22(1)           | 4(1)            | 1(1)            | 4(1)            |
| C(5)  | 19(1)           | 24(1)           | 22(1)           | 3(1)            | -1(1)           | 3(1)            |
| C(6)  | 31(1)           | 27(1)           | 27(1)           | 6(1)            | 5(1)            | 9(1)            |
| C(7)  | 41(1)           | 32(1)           | 29(1)           | 5(1)            | 11(1)           | 13(1)           |
| C(8)  | 41(1)           | 39(1)           | 25(1)           | 8(1)            | 9(1)            | 10(1)           |
| C(9)  | 41(1)           | 42(1)           | 29(1)           | 13(1)           | 4(1)            | 18(1)           |
| C(10) | 30(1)           | 36(1)           | 26(1)           | 7(1)            | 1(1)            | 14(1)           |
| C(11) | 18(1)           | 21(1)           | 22(1)           | 4(1)            | 2(1)            | 5(1)            |
| C(12) | 19(1)           | 24(1)           | 19(1)           | 4(1)            | 2(1)            | 5(1)            |
| C(13) | 25(1)           | 24(1)           | 28(1)           | 6(1)            | 4(1)            | 8(1)            |
| C(14) | 28(1)           | 36(1)           | 33(1)           | 9(1)            | 6(1)            | 15(1)           |
| C(15) | 21(1)           | 42(1)           | 34(1)           | 11(1)           | 7(1)            | 9(1)            |
| C(16) | 23(1)           | 32(1)           | 31(1)           | 11(1)           | 6(1)            | 3(1)            |
| C(17) | 23(1)           | 25(1)           | 20(1)           | 6(1)            | 3(1)            | 5(1)            |
| C(18) | 25(1)           | 22(1)           | 22(1)           | 5(1)            | 3(1)            | 6(1)            |
| C(19) | 35(1)           | 24(1)           | 36(1)           | 9(1)            | 7(1)            | 6(1)            |
| C(20) | 46(1)           | 24(1)           | 45(1)           | 11(1)           | 8(1)            | 14(1)           |
| C(21) | 38(1)           | 33(1)           | 39(1)           | 8(1)            | 4(1)            | 18(1)           |
| C(22) | 26(1)           | 30(1)           | 28(1)           | 6(1)            | 3(1)            | 11(1)           |
| C(23) | 24(1)           | 22(1)           | 20(1)           | 3(1)            | 2(1)            | 7(1)            |
| C(24) | 20(1)           | 24(1)           | 21(1)           | 1(1)            | 2(1)            | 6(1)            |
| C(25) | 26(1)           | 24(1)           | 23(1)           | 2(1)            | 5(1)            | 7(1)            |
| C(26) | 33(1)           | 29(1)           | 24(1)           | 6(1)            | 6(1)            | 8(1)            |
| C(27) | 34(1)           | 35(1)           | 26(1)           | 6(1)            | -1(1)           | 12(1)           |

|       |       |       |       |       |       |       |
|-------|-------|-------|-------|-------|-------|-------|
| C(28) | 24(1) | 34(1) | 25(1) | 2(1)  | -1(1) | 8(1)  |
| C(29) | 21(1) | 25(1) | 22(1) | 1(1)  | 3(1)  | 7(1)  |
| C(30) | 25(1) | 37(1) | 31(1) | 9(1)  | 8(1)  | 6(1)  |
| C(31) | 45(1) | 62(1) | 37(1) | 21(1) | -7(1) | 11(1) |
| C(32) | 20(1) | 37(1) | 26(1) | 5(1)  | 3(1)  | 2(1)  |
| C(33) | 20(1) | 25(1) | 25(1) | 7(1)  | 5(1)  | 6(1)  |
| C(34) | 22(1) | 30(1) | 31(1) | 9(1)  | 6(1)  | 8(1)  |
| C(35) | 21(1) | 39(1) | 37(1) | 15(1) | 8(1)  | 12(1) |
| C(36) | 34(1) | 41(1) | 33(1) | 15(1) | 13(1) | 22(1) |
| C(37) | 35(1) | 30(1) | 30(1) | 5(1)  | 8(1)  | 14(1) |
| C(38) | 26(1) | 28(1) | 25(1) | 6(1)  | 5(1)  | 8(1)  |
| C(39) | 19(1) | 38(1) | 50(1) | -1(1) | 2(1)  | 5(1)  |
| C(40) | 48(1) | 61(1) | 49(1) | 16(1) | 20(1) | 37(1) |
| C(41) | 27(1) | 28(1) | 33(1) | -3(1) | 2(1)  | 5(1)  |
| C(42) | 40(1) | 39(1) | 60(1) | 17(1) | 3(1)  | 8(1)  |
| C(43) | 39(1) | 62(1) | 58(1) | 22(1) | 10(1) | 23(1) |
| O(3)  | 37(1) | 47(1) | 48(1) | 12(1) | 8(1)  | 19(1) |
| C(44) | 61(1) | 64(2) | 54(1) | 13(1) | 14(1) | 31(1) |
| C(45) | 76(2) | 58(2) | 56(1) | 8(1)  | -5(1) | 25(1) |

---

Table 5. Hydrogen coordinates ( $\times 10^4$ ) and isotropic displacement parameters ( $\text{\AA}^2 \times 10^3$ ) for **4**.

|        | x        | y        | z        | U(eq) |
|--------|----------|----------|----------|-------|
| H(1)   | 9890     | 9421     | 3366     | 27    |
| H(3A)  | 7476     | 10490    | 1634     | 71    |
| H(3B)  | 8738     | 11282    | 1438     | 71    |
| H(3C)  | 8299     | 11693    | 2412     | 71    |
| H(1N)  | 9300(18) | 9427(19) | 4686(15) | 31    |
| H(4)   | 9477     | 7654     | 4438     | 27    |
| H(6)   | 7640     | 8971     | 5727     | 34    |
| H(7)   | 7335     | 8834     | 7264     | 41    |
| H(8)   | 7954     | 7510     | 7962     | 43    |
| H(9)   | 8896     | 6314     | 7114     | 43    |
| H(10)  | 9239     | 6475     | 5594     | 37    |
| H(13)  | 6381     | 8426     | 3923     | 32    |
| H(14)  | 4356     | 7896     | 4076     | 37    |
| H(15)  | 3212     | 5922     | 4015     | 39    |
| H(16)  | 4087     | 4434     | 3871     | 35    |
| H(19)  | 5461     | 3119     | 3732     | 39    |
| H(20)  | 7009     | 2323     | 3686     | 45    |
| H(21)  | 8951     | 3551     | 3687     | 42    |
| H(22)  | 9393     | 5573     | 3693     | 34    |
| H(26)  | 7858     | 8567     | -455     | 35    |
| H(28)  | 4714     | 6553     | 58       | 35    |
| H(30A) | 9679     | 7841     | 660      | 48    |
| H(30B) | 9701     | 8822     | 1591     | 48    |
| H(30C) | 9639     | 9124     | 570      | 48    |
| H(31A) | 6004     | 8458     | -1396    | 75    |
| H(31B) | 4745     | 7744     | -1146    | 75    |
| H(31C) | 5441     | 7023     | -1763    | 75    |
| H(32A) | 4992     | 6470     | 2034     | 45    |
| H(32B) | 5835     | 5675     | 1975     | 45    |
| H(32C) | 4710     | 5337     | 1145     | 45    |

|        |       |       |      |    |
|--------|-------|-------|------|----|
| H(35)  | 12312 | 6789  | 2414 | 37 |
| H(37)  | 9450  | 4057  | 814  | 38 |
| H(39A) | 12187 | 8344  | 3482 | 59 |
| H(39B) | 10930 | 8381  | 3742 | 59 |
| H(39C) | 11433 | 8932  | 2894 | 59 |
| H(40A) | 12252 | 5072  | 720  | 71 |
| H(40B) | 11357 | 3842  | 862  | 71 |
| H(40C) | 12420 | 4717  | 1713 | 71 |
| H(41A) | 7558  | 3948  | 846  | 49 |
| H(41B) | 7343  | 5192  | 883  | 49 |
| H(41C) | 7304  | 4666  | 1807 | 49 |
| H(42A) | 4619  | 11049 | 3677 | 71 |
| H(42B) | 5580  | 10517 | 4072 | 71 |
| H(42C) | 4180  | 9749  | 3892 | 71 |
| H(43A) | 5506  | 10319 | 2442 | 61 |
| H(43B) | 5048  | 9014  | 2652 | 61 |
| H(44A) | 3847  | 8086  | 1143 | 69 |
| H(44B) | 4347  | 9338  | 851  | 69 |
| H(45A) | 1884  | 8071  | 815  | 97 |
| H(45B) | 2488  | 8164  | -111 | 97 |
| H(45C) | 2371  | 9337  | 550  | 97 |

---
